# Supplementary material for: Longitudinal analysis of T2 relaxation time variations following radiotherapy for prostate cancer
Source: PubMed Central journal article supplement — Heliyon. 2024 Jan 15;10(2):e24557. doi: 10.1016/j.heliyon.2024.e24557 (PMC10828070; doi:10.1016/j.heliyon.2024.e24557), 2024-01-15
Supplement: mmc1.pdf [file mmc1.pdf]

Table S1 Results of Pairwise T-Tests with Bonferroni Correction for Multiple Comparisons Between Groups M<sub>0</sub> to M<sub>6</sub>.

| Group A        | Group B        | T Statistic | P-Value<br>(Bonferroni Corrected) |
|----------------|----------------|-------------|-----------------------------------|
| M <sub>0</sub> | M <sub>1</sub> | 4.967       | 0.002                             |
| M <sub>0</sub> | M <sub>2</sub> | 10.226      | << 0.001                          |
| M <sub>0</sub> | M <sub>3</sub> | 12.564      | << 0.001                          |
| M <sub>0</sub> | M <sub>4</sub> | 11.607      | << 0.001                          |
| M <sub>0</sub> | M <sub>5</sub> | 10.488      | << 0.001                          |
| M <sub>0</sub> | M <sub>6</sub> | 12.327      | << 0.001                          |
| M <sub>1</sub> | M <sub>2</sub> | 3.007       | 0.146                             |
| M <sub>1</sub> | M <sub>3</sub> | 3.940       | 0.017                             |
| M <sub>1</sub> | M <sub>4</sub> | 3.679       | 0.031                             |
| M <sub>1</sub> | M <sub>5</sub> | 3.534       | 0.044                             |
| M <sub>1</sub> | M <sub>6</sub> | 3.420       | 0.057                             |
| M <sub>2</sub> | M <sub>3</sub> | 1.378       | > 0.99                            |
| M <sub>2</sub> | M <sub>4</sub> | 1.377       | > 0.99                            |
| M <sub>2</sub> | M <sub>5</sub> | 1.089       | > 0.99                            |
| M <sub>2</sub> | M <sub>6</sub> | 0.860       | > 0.99                            |
| M <sub>3</sub> | M <sub>4</sub> | -0.243      | > 0.99                            |
| M <sub>3</sub> | M <sub>5</sub> | -0.208      | > 0.99                            |
| M <sub>3</sub> | M <sub>6</sub> | -0.410      | > 0.99                            |
| M <sub>4</sub> | M <sub>5</sub> | 0.0138      | > 0.99                            |
| M <sub>4</sub> | M <sub>6</sub> | -0.227      | > 0.99                            |
| M <sub>5</sub> | M <sub>6</sub> | -0.281      | > 0.99                            |

Note: M<sub>0</sub> Baseline – prior to the radiotherapy; M<sub>1</sub> Two weeks after the radiotherapy; M<sub>2</sub> – M<sub>6</sub> monthly interval check-ups.
